# Supplementary material
Source: PubMed Central journal article supplement (PMC3285368)

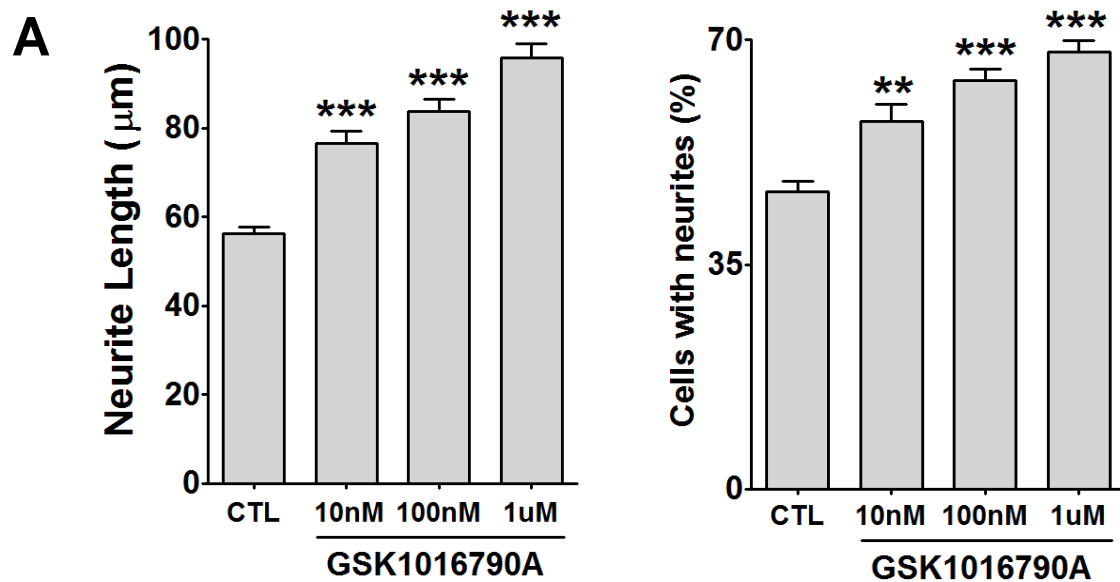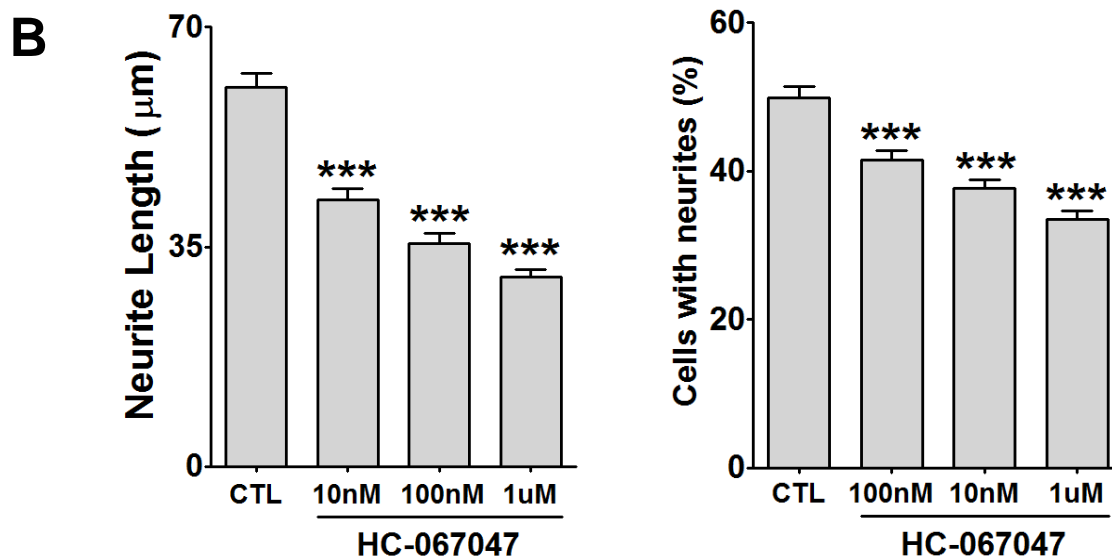

Supplemental Figure S1

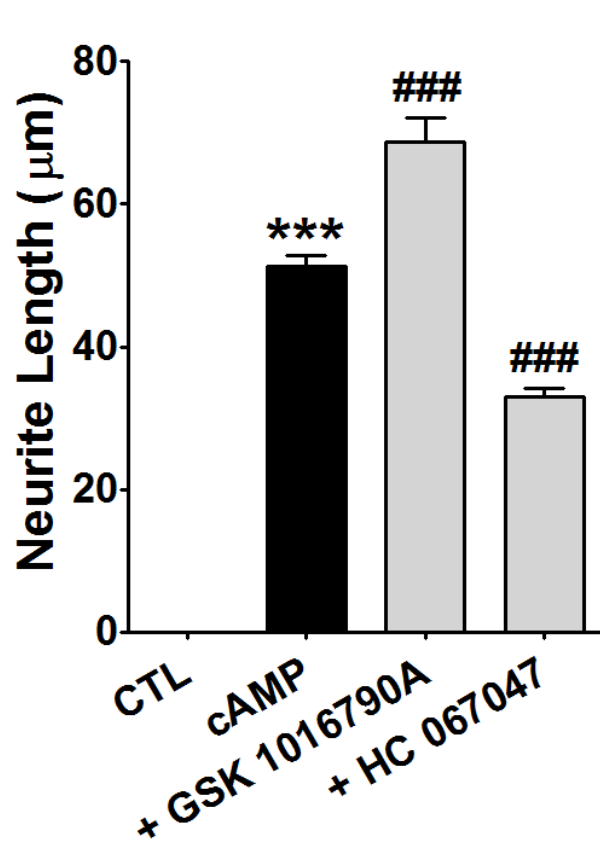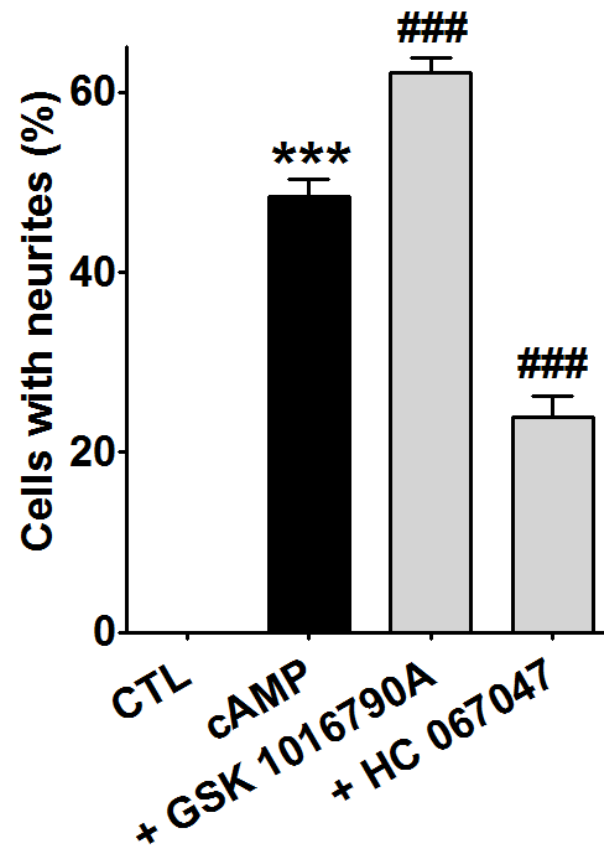

Supplemental Figure S2

Supplement: supp_M111.316315_jbc.M111.316315-1.pdf [file supp_M111.316315_jbc.M111.316315-1.pdf]
